# Supplementary material
Source: MDPI journal article supplement (https://www.mdpi.com/2079-8954/9/2/23)
Supplement: s1 [file s1]

Archive with 7 entries (7 files):
- S1 Class activity to create the base map.pdf
- S2 Exposure to the failure case.pdf
- S3 Exposure to the success case.pdf
- S4-Edge-characteristics.png
- S5-Cycles.png
- S6-Chains.png
- S7-Diameter.png
