# Supplementary material
Source: MDPI journal article supplement (https://www.mdpi.com/2079-8954/9/2/23)

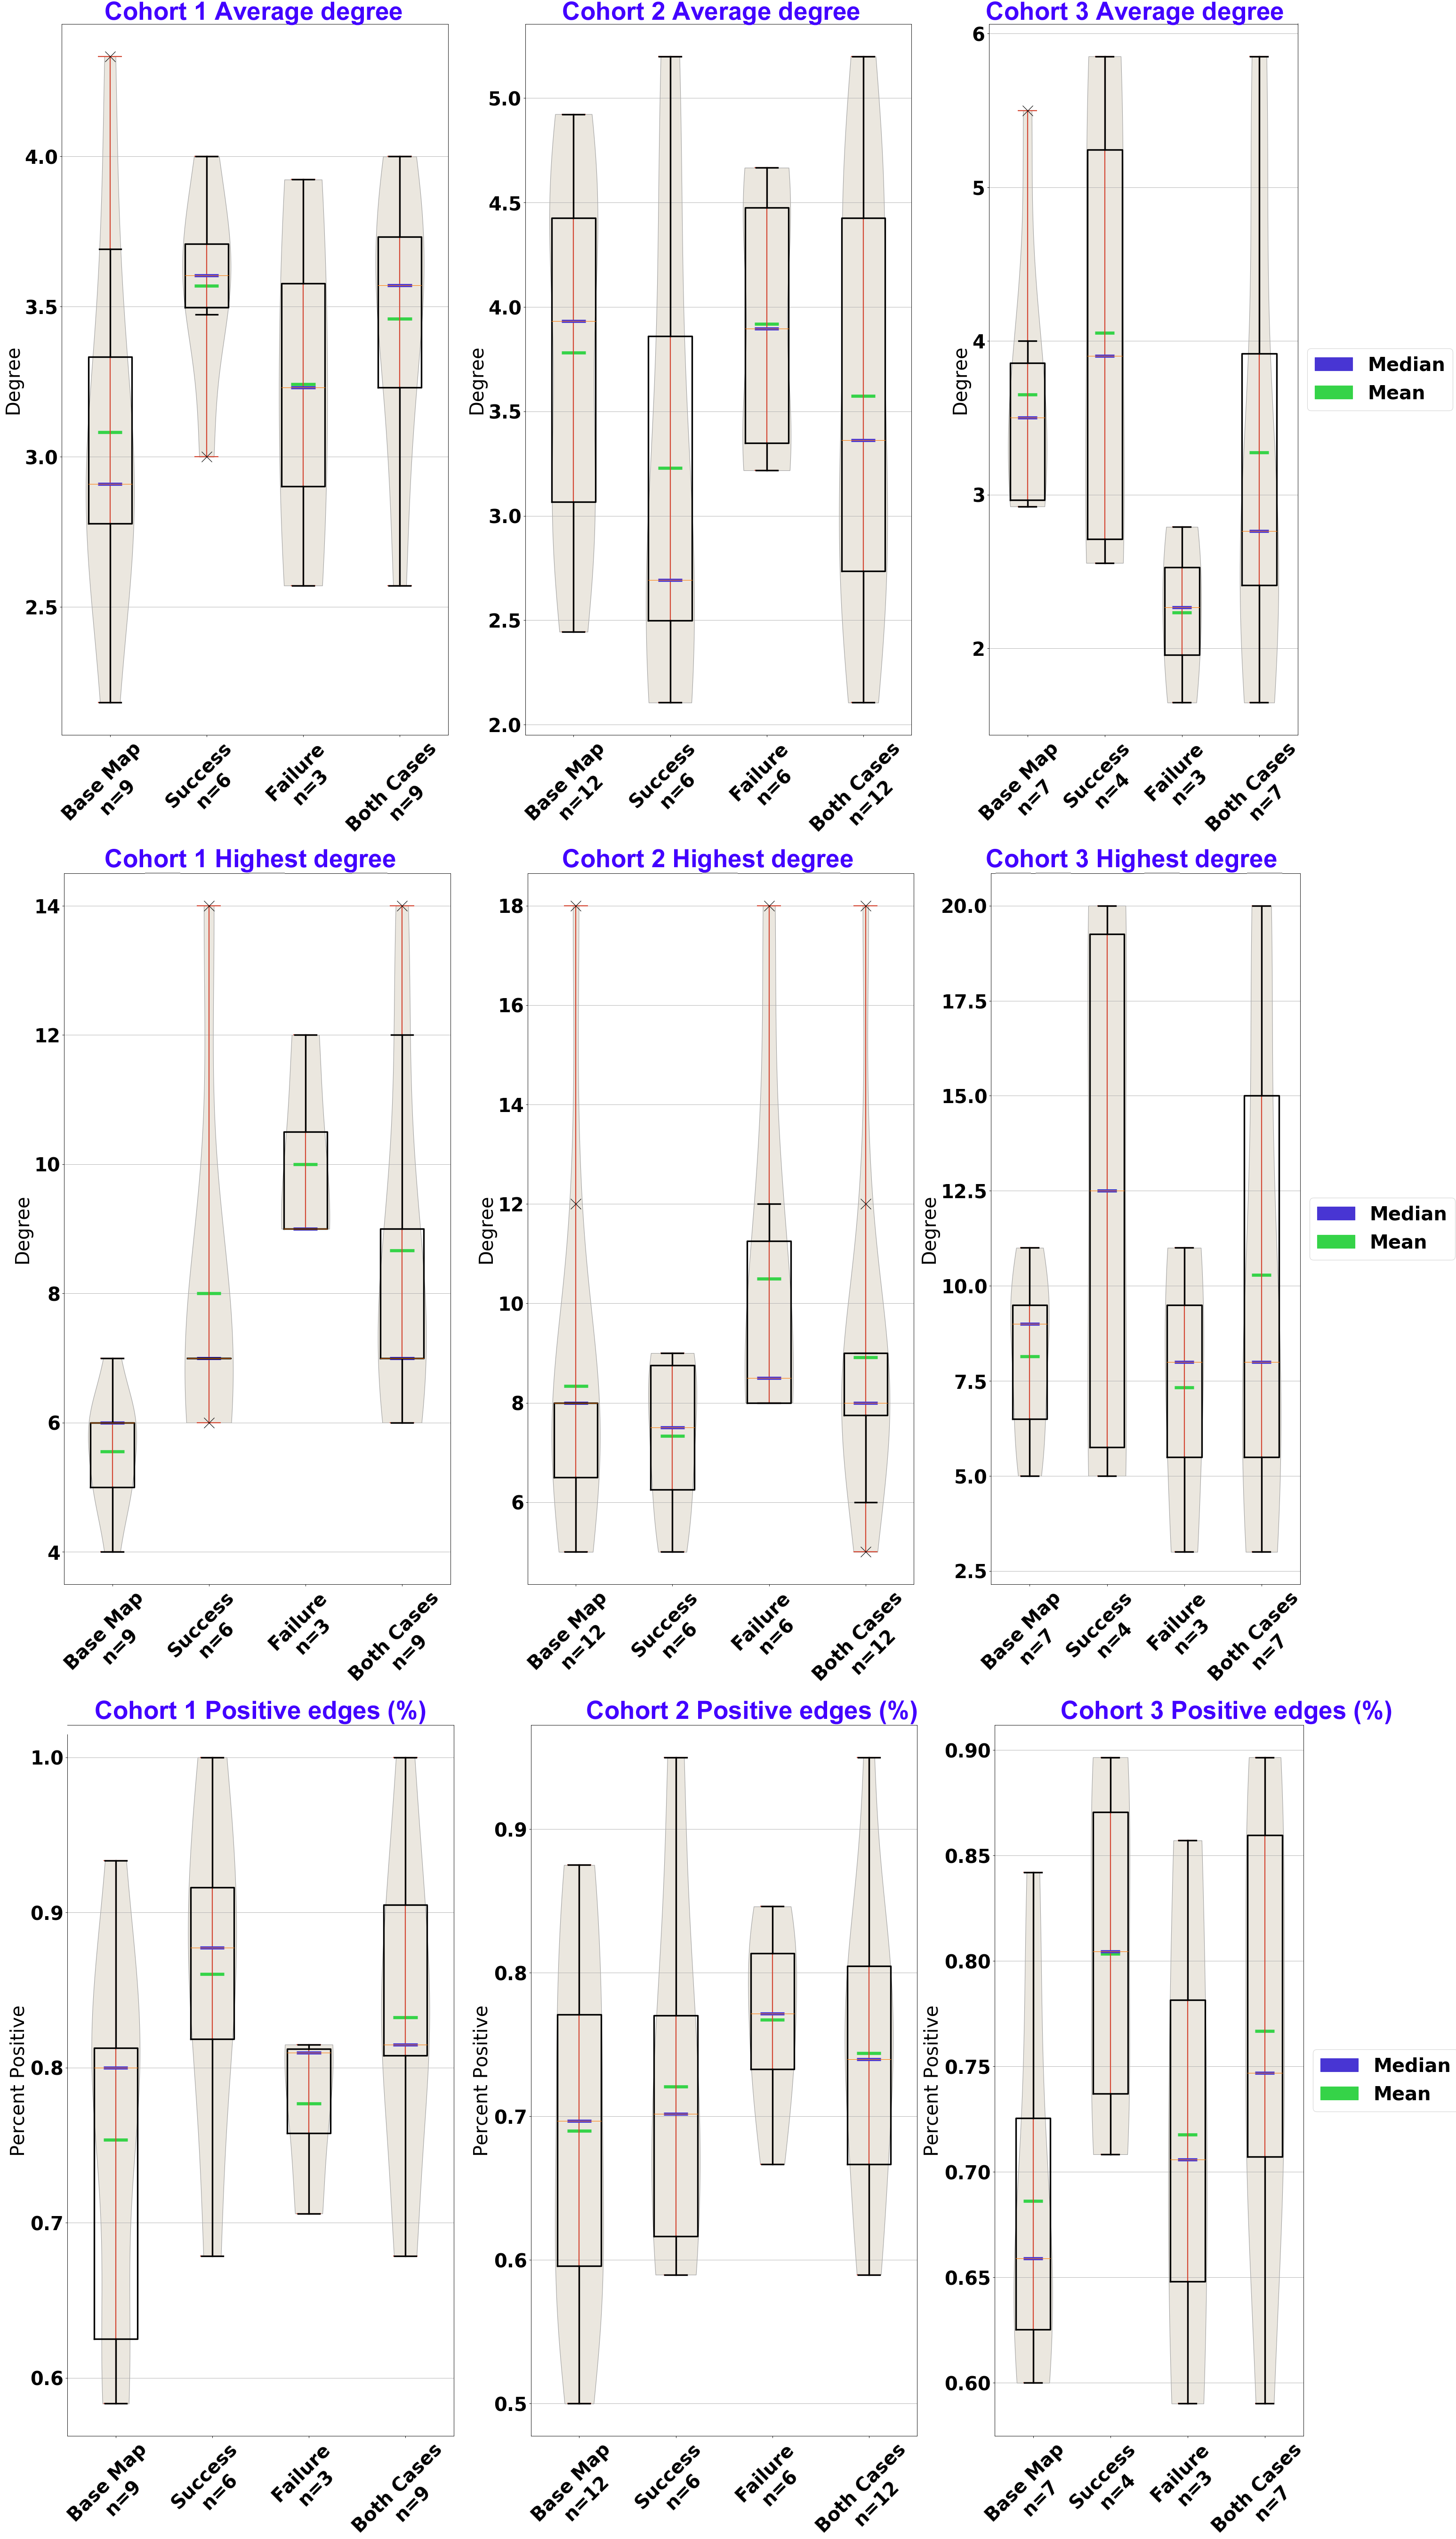

Supplement: s1 [file s1 › S4-Edge-characteristics.png]

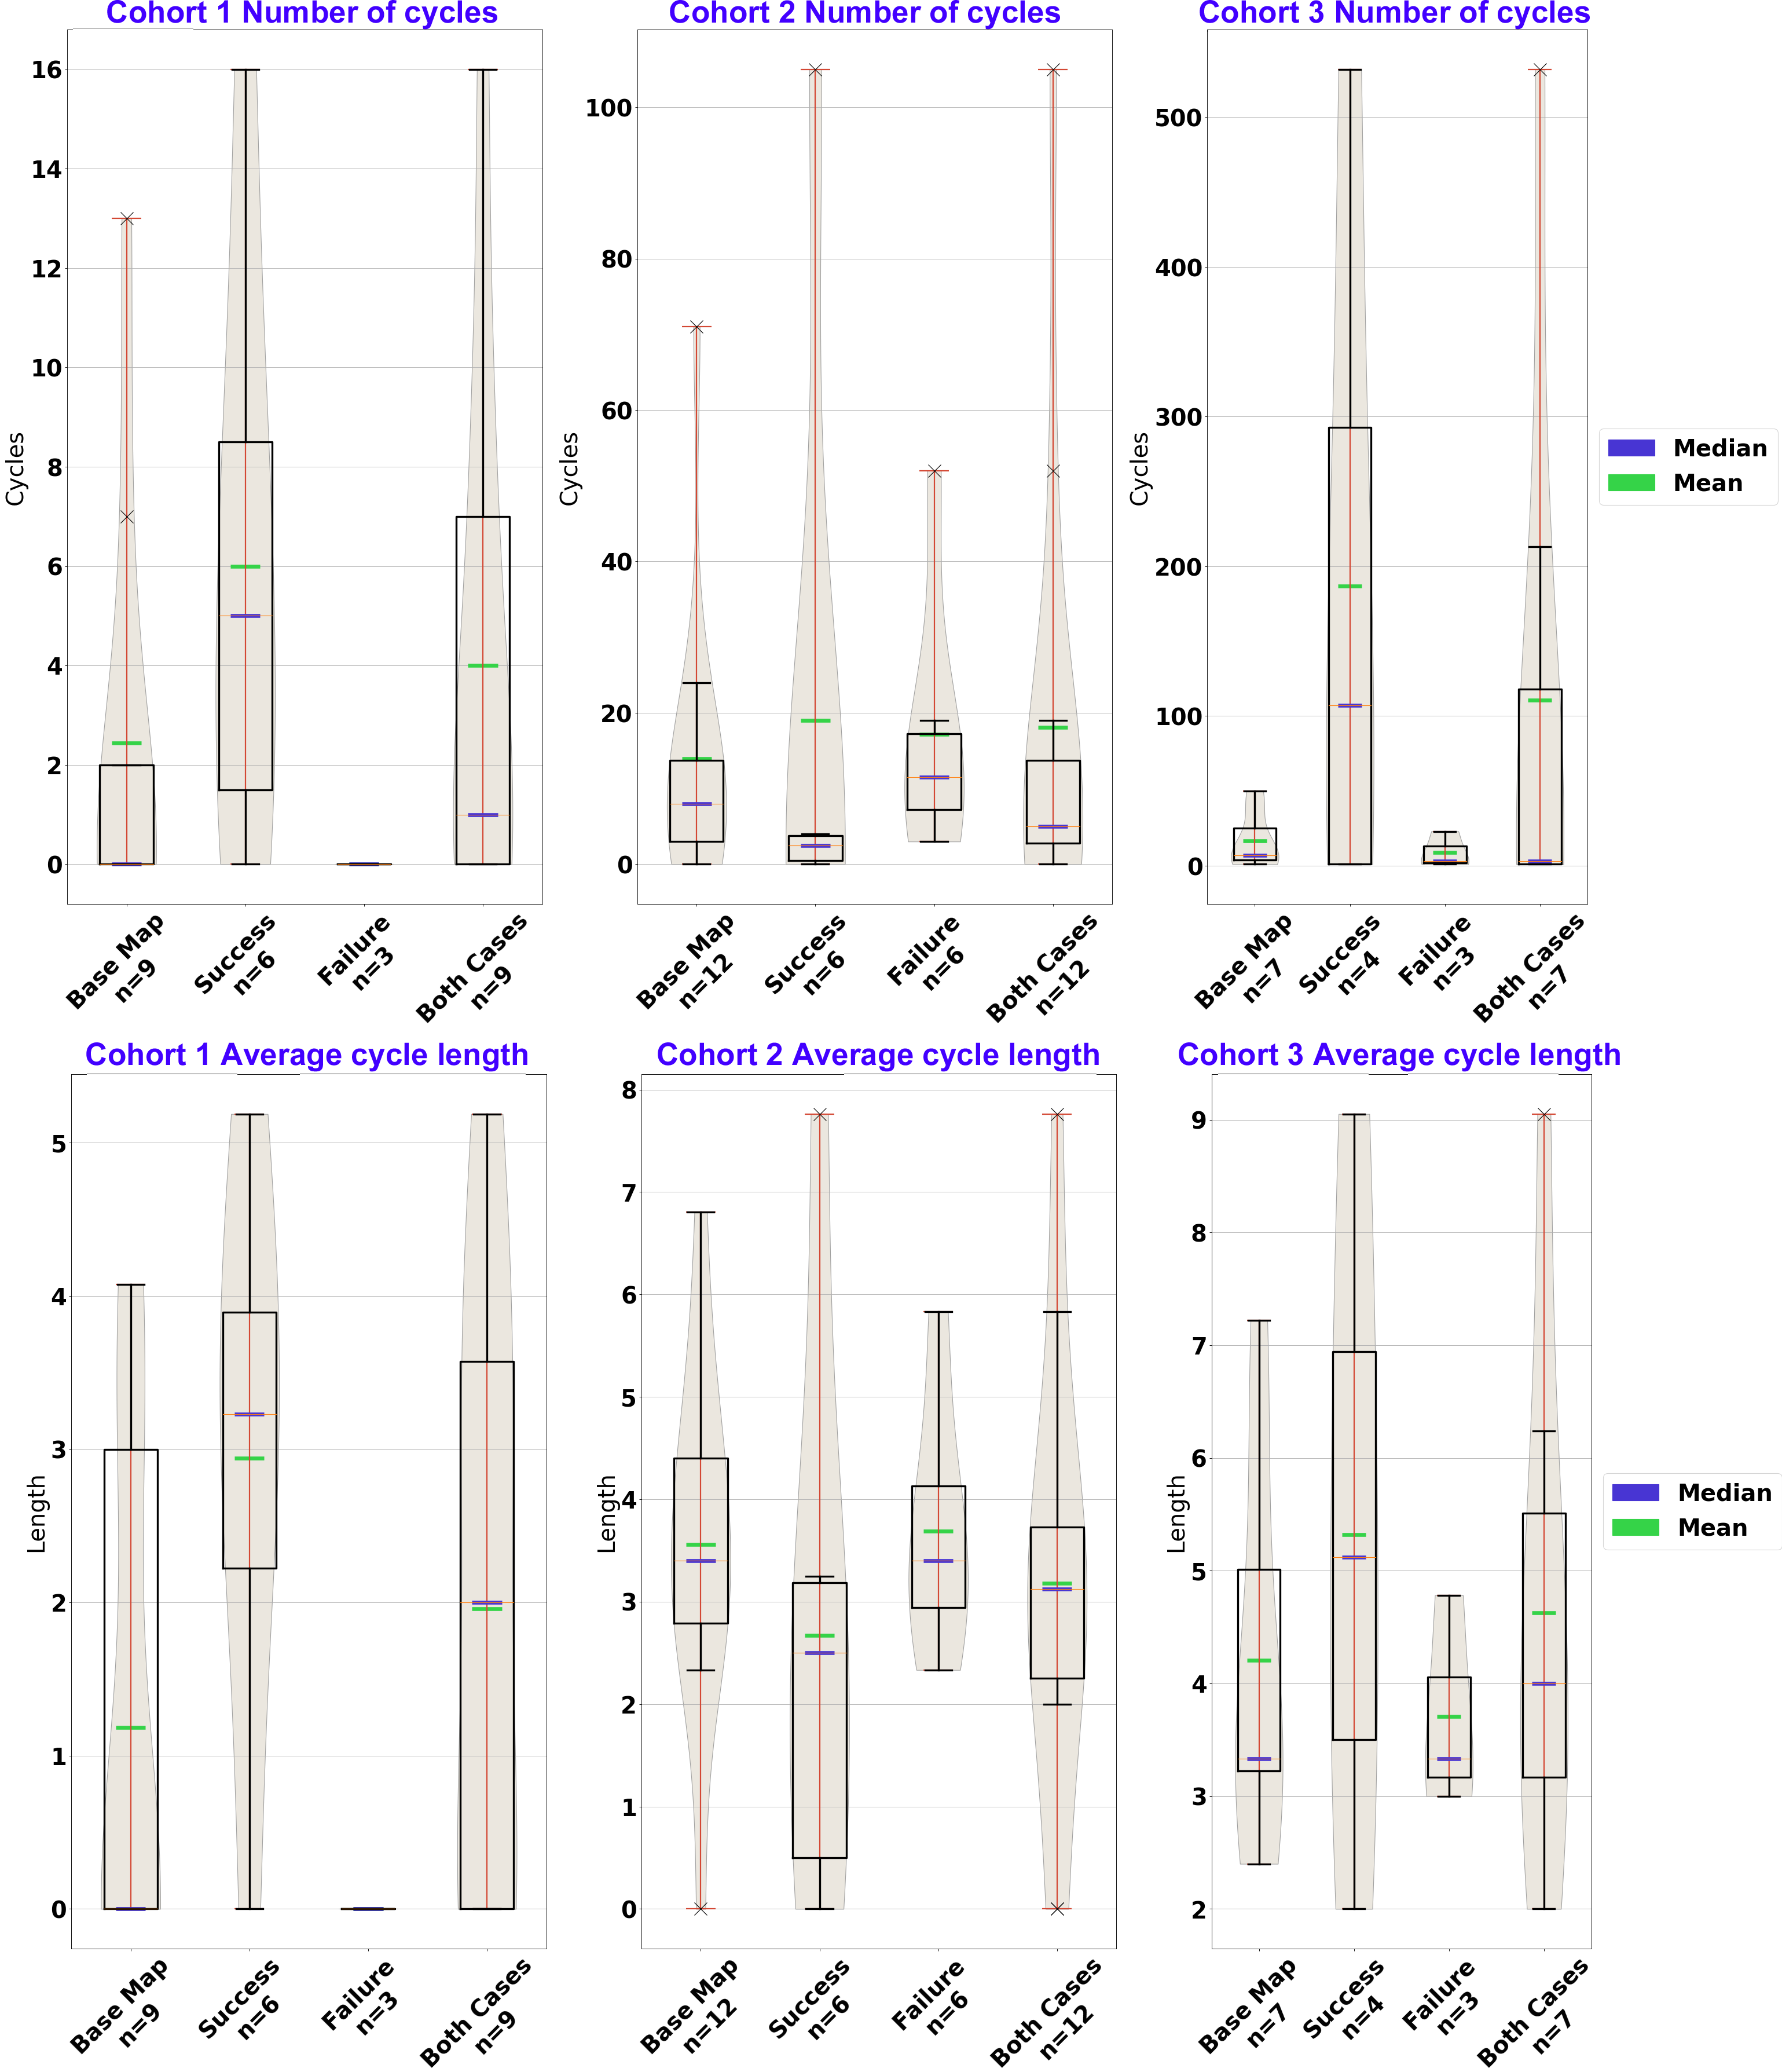

Supplement: s1 [file s1 › S5-Cycles.png]

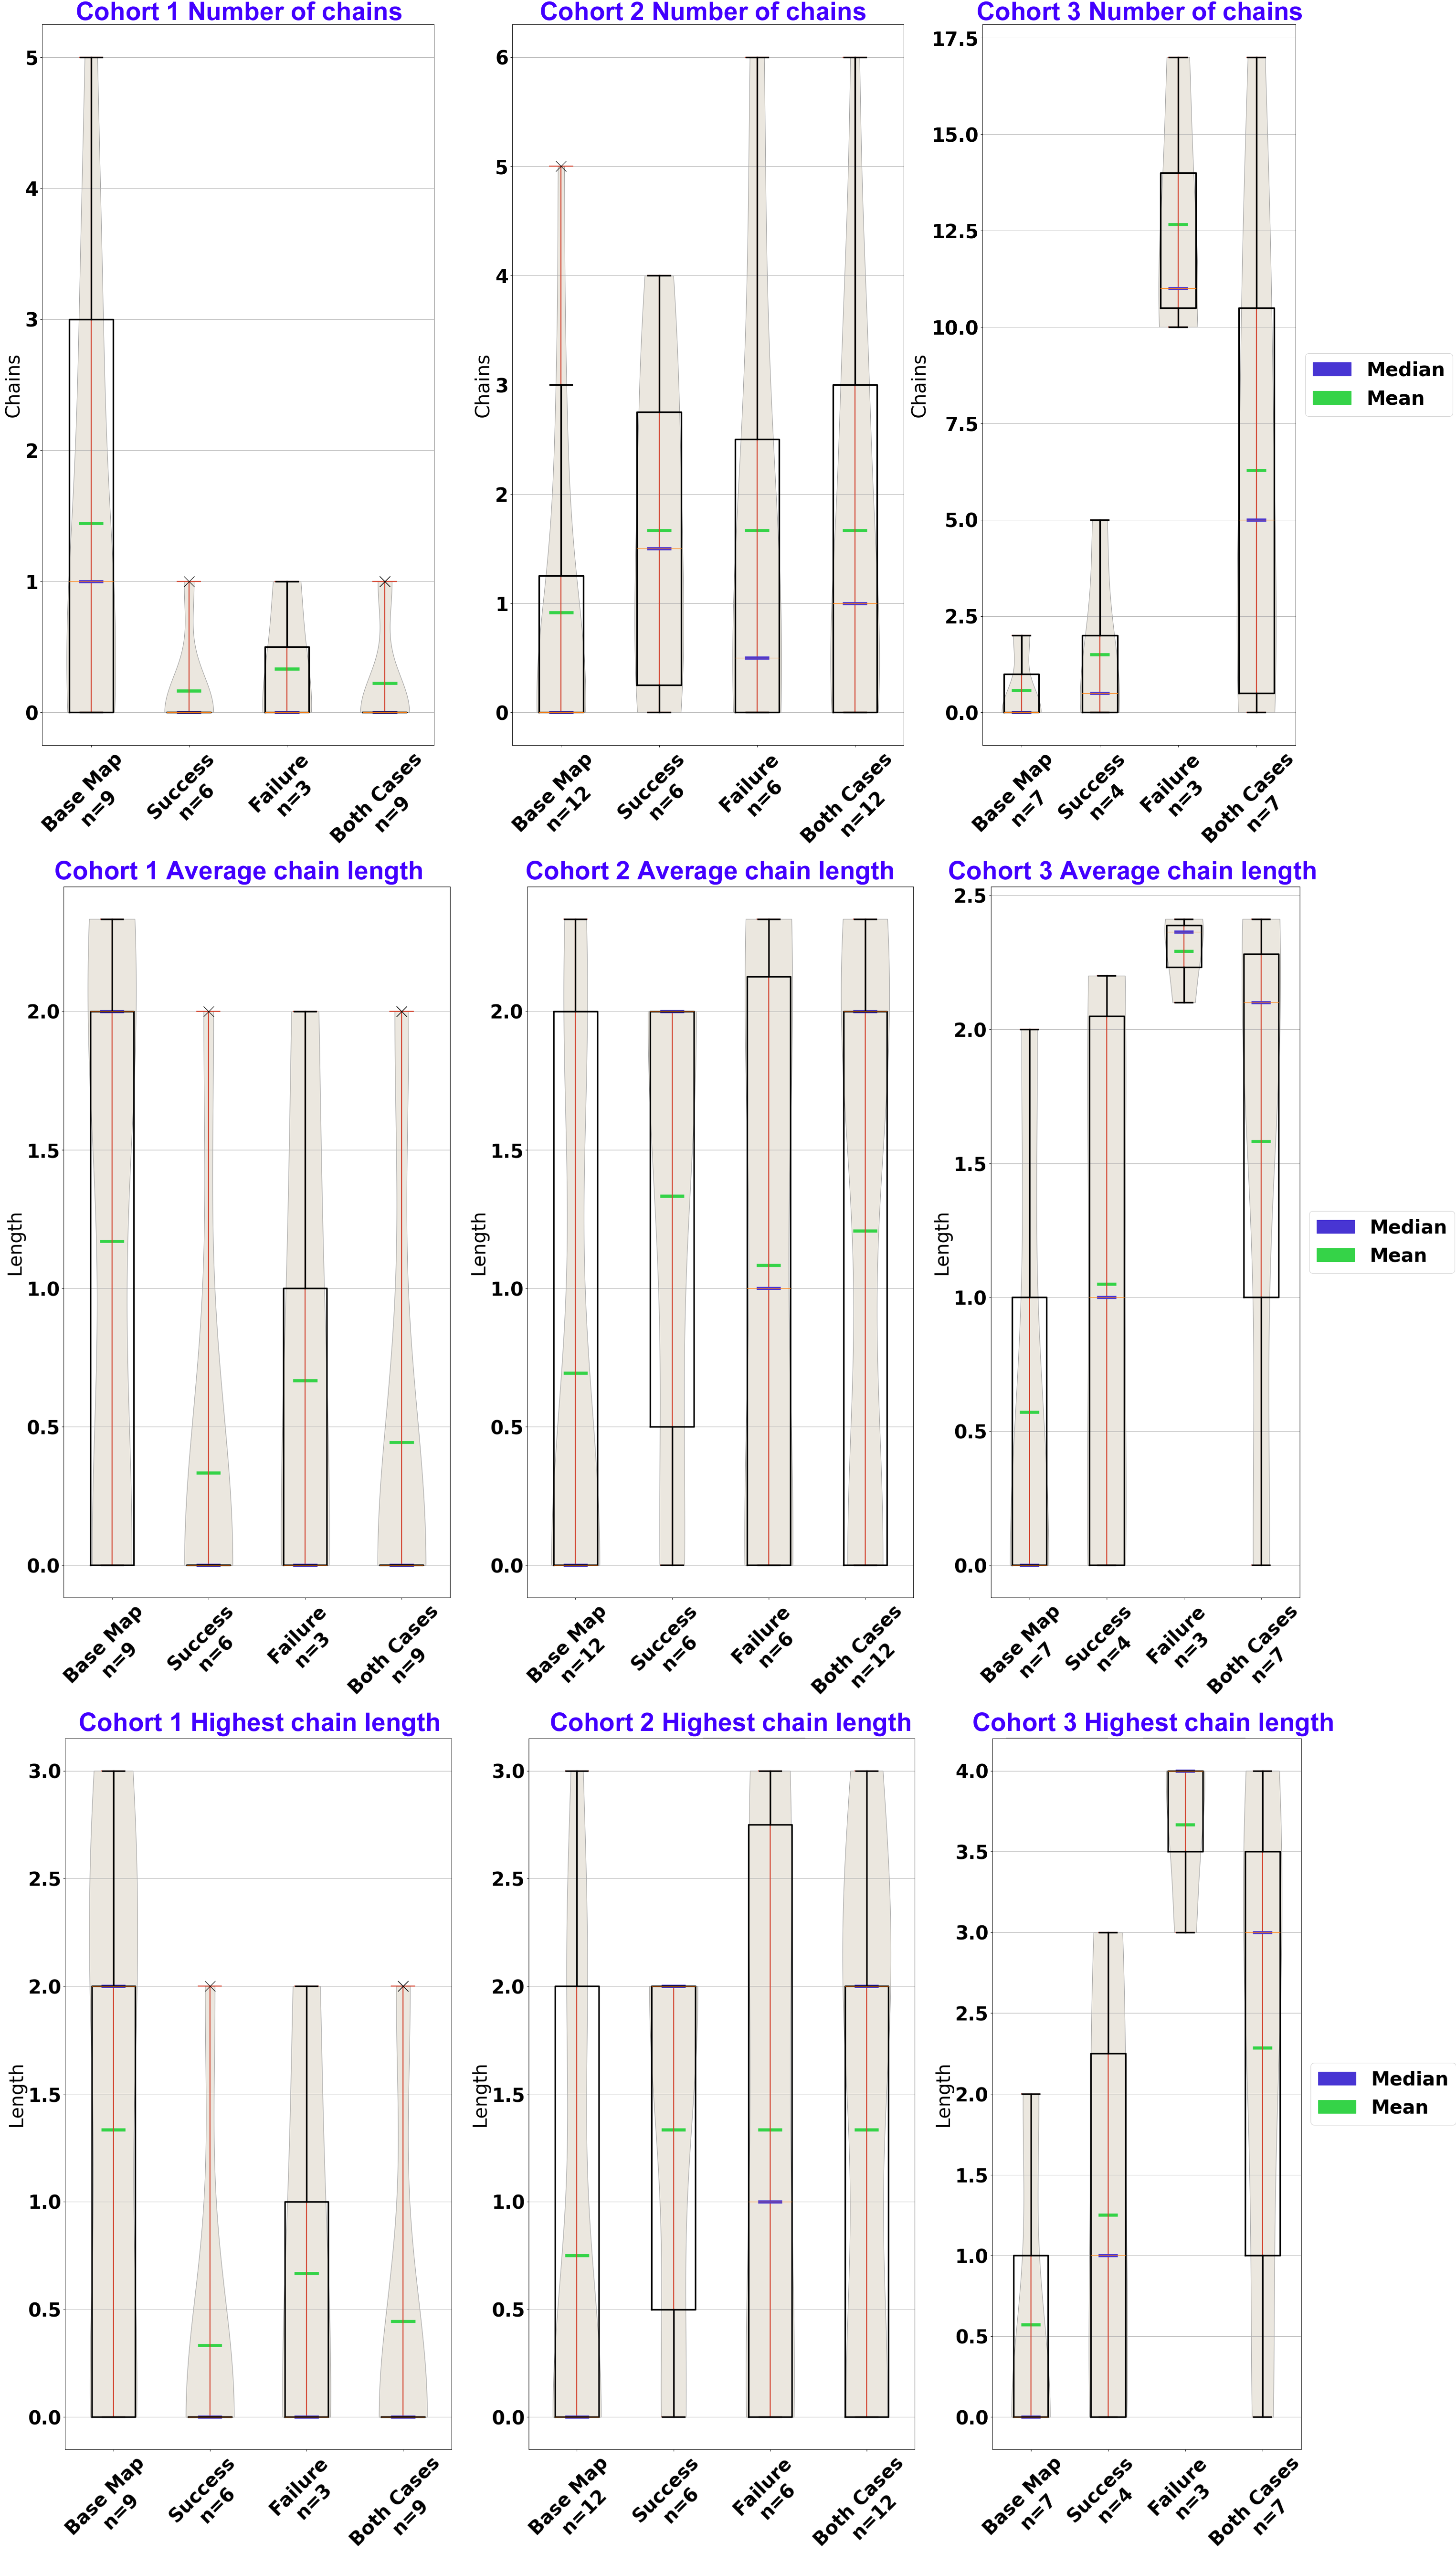

Supplement: s1 [file s1 › S6-Chains.png]

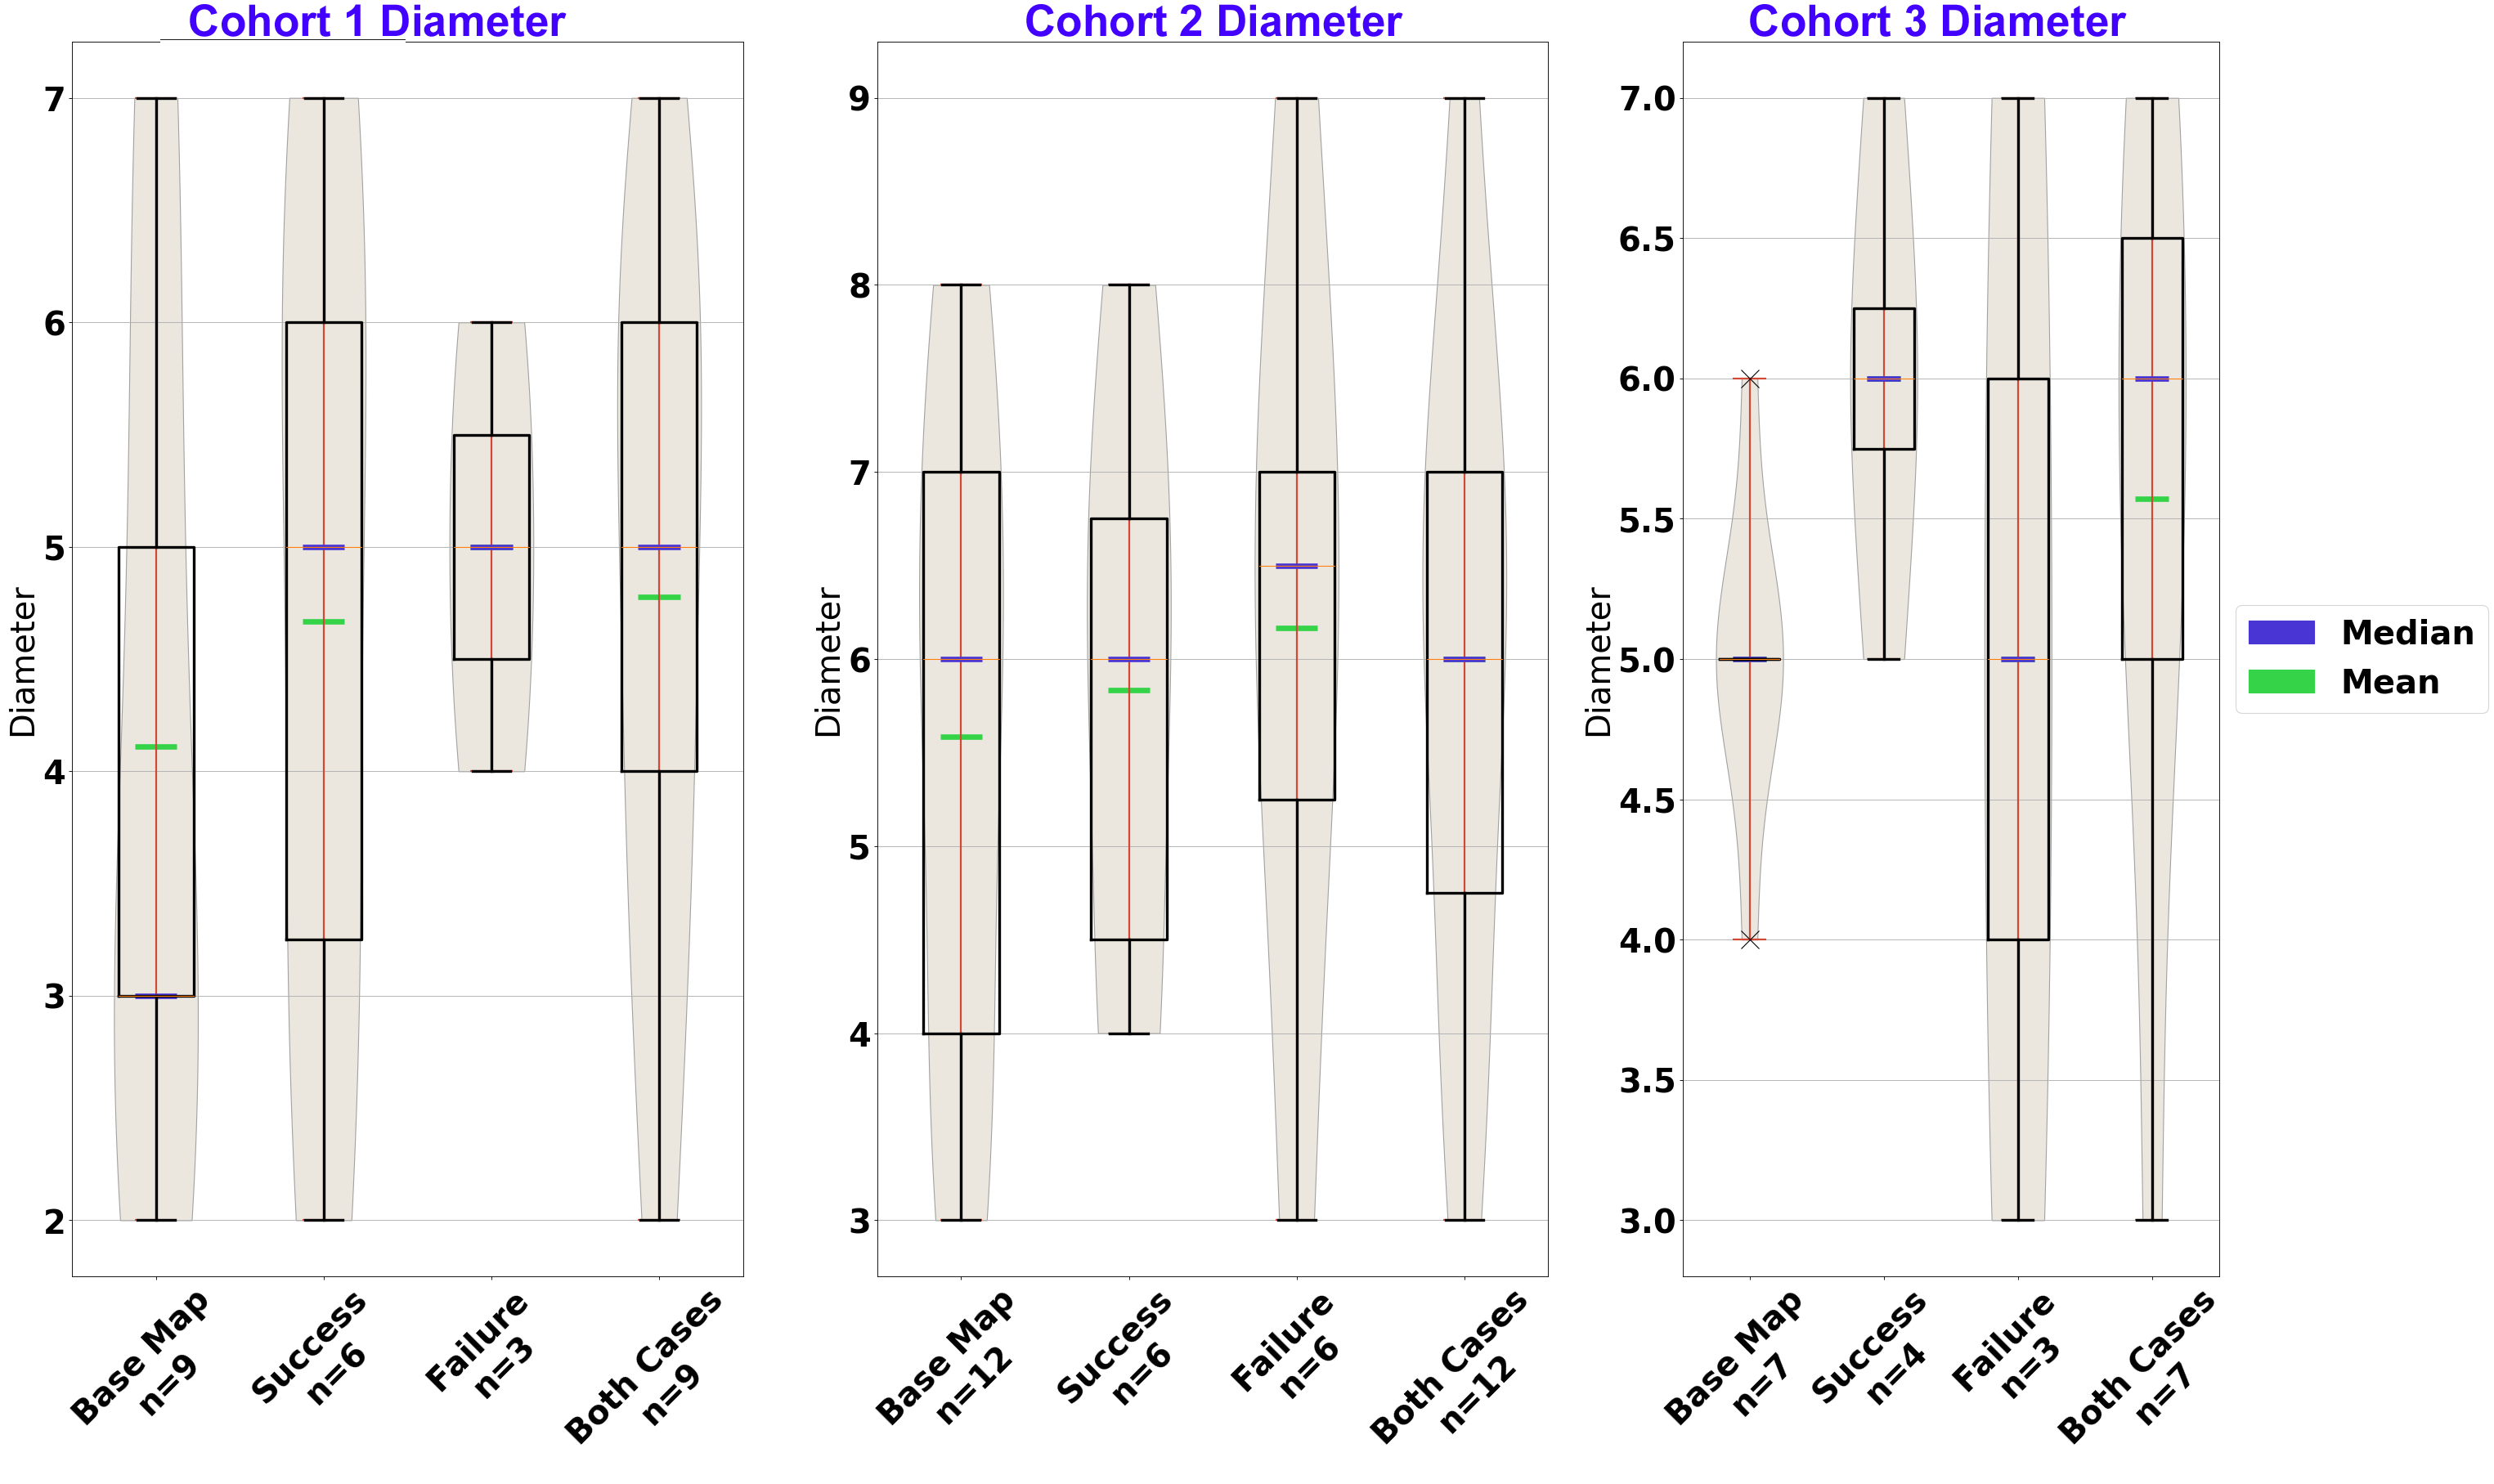

Supplement: s1 [file s1 › S7-Diameter.png]
